# Supplementary material for: An engineering method to estimate the stress and stress state including the damping ratio differences of various modes
Source: Research Square preprint supplement (doi:10.21203/rs.3.rs-6709005/v1), 2025-06-19
Supplement: Supplementary file 1 [file 2738d0cfa6a4ea0765a7e971.docx]

# Appendix 1

The time histories of the test strains of S1-S5 under the loads in different frequency ranges are shown in Fig. A1.1-A1.3.

Fig. A1.1 Time histories of the strains under loads in 70-130 Hz

Fig. A1.2 Time histories of the strains under loads in 230-290 Hz

Fig. A1.3 Time histories of the strains under loads in 390-450 Hz

# Appendix 2

The detailed strain results in the simulation in Section 2.3.2 are listed in Fig. A2. In each figure, four nodes are observed (outlined by the red circles). The area surrounded by those four nodes approximates to the one monitored by the strain gauge. In order to express conveniently, that area is directly named as the strain gauge number, namely S1-S5. There are three values at each node. They correspond to the strains under the loads in 70-130 Hz, 230-290 Hz and 390-450 Hz, respectively. The mean value of the strains at the four nodes is taken as the strain of the monitored area. The mean values are listed in Table 2.

|  |  |  |
| --- | --- | --- |
| 1. Strain of S1 | 1. Strain of S2 | 1. Strain of S3 |
|  |  |  |
| 1. Strain of S4 | 1. Strain of S5 |  |
| Fig. A2 Simulation strains at observed nodes | | |

# Appendix 3

Table A3 Statistic stress components and phase angles of the ten observed nodes

| Observed node | Mode truncation |  | SX | SY | SZ | SXY | SYZ | SXZ | Resultant Von Mises stress |
| --- | --- | --- | --- | --- | --- | --- | --- | --- | --- |
| 1 | 1 | Stress | 116.8 | 7.5 | 2.2 | 35.3 | 0.5 | 2.6 | 154.7 |
| Phase | -87.4 | -25.9 | -77.5 | -62.5 | 12.2 | -86.6 |
| 2 | Stress | 4.8 | 0.4 | 0.1 | 1.0 | 0.1 | 0.1 |
| Phase | 83.4 | -31.1 | 67.2 | 30.7 | 5.9 | 85.9 |
| 3 | Stress | 24.2 | 2.8 | 0.7 | 14.8 | 0.2 | 0.2 |
| Phase | -90.8 | -47.9 | -86.5 | -87.0 | -86.1 | -91.7 |
| 2 | 1 | Stress | 270.6 | 30.1 | 16.6 | 59.6 | 12.5 | 14.3 | 323.7 |
| Phase | -34.8 | -13.6 | -31.4 | -28.9 | -51.8 | -65.4 |
| 2 | Stress | 41.4 | 4.4 | 2.6 | 9.0 | 2.0 | 2.3 |
| Phase | -67.1 | -34.4 | -66.6 | -61.4 | -78.6 | -83.5 |
| 3 | Stress | 17.6 | 2.3 | 2.9 | 2.0 | 1.2 | 1.9 |
| Phase | -40.5 | 14.4 | 59.4 | -13.0 | -34.0 | -74.6 |
| 3 | 1 | Stress | 227.2 | 18.7 | 21.8 | 61.2 | 14.2 | 24.9 | 214.0 |
| Phase | 71.3 | 108.0 | 67.9 | -103.5 | -99.4 | 60.5 |
| 2 | Stress | 41.4 | 4.4 | 2.6 | 9.0 | 2.0 | 2.3 |
| Phase | -73.4 | -105.9 | -69.0 | 100.1 | 97.3 | -59.1 |
| 3 | Stress | 4.8 | 4.8 | 0.4 | 6.4 | 0.4 | 1.0 |
| Phase | 50.6 | 90.0 | -58.9 | -95.2 | -92.6 | -82.4 |
| 4 | 1 | Stress | 258.5 | 40.0 | 25.8 | 69.2 | 16.5 | 14.9 | 265.6 |
|  | Phase | 81.4 | 152.5 | 102.8 | -69.3 | 49.0 | -139.0 |
| 2 | Stress | 10.7 | 3.4 | 1.2 | 3.6 | 0.5 | 0.4 |
|  | Phase | -78.0 | -144.7 | -108.9 | 63.2 | -15.9 | 175.9 |
| 3 | Stress | 14.7 | 64.7 | 6.8 | 32.8 | 7.9 | 10.9 |
|  | Phase | 80.9 | 93.1 | 91.5 | -88.2 | -85.3 | 94.0 |
| 5 | 1 | Stress | 322.2 | 33.2 | 14.6 | 65.8 | 18.3 | 26.1 | 500.7 |
|  | Phase | 94.6 | 139.7 | 108.6 | -72.8 | -99.0 | 76.2 |
| 2 | Stress | 10.1 | 2.5 | 0.5 | 2.9 | 0.5 | 0.7 |
|  | Phase | 96.6 | 130.1 | 128.7 | -65.1 | 149.4 | -47.1 |
| 3 | Stress | 169.2 | 45.2 | 9.6 | 47.2 | 6.2 | 7.4 |
|  | Phase | 86.7 | 90.0 | 88.7 | -91.9 | -95.0 | 83.6 |
| 6 | 1 | Stress | 70.1 | 3.8 | 1.7 | 1.4 | 0.1 | 4.2 | 85.8 |
|  | Phase | 141.3 | 45.8 | 149.1 | 178.5 | -1.4 | -65.0 |
| 2 | Stress | 1.9 | 0.2 | 0.0 | 0.5 | 0.0 | 0.1 |
|  | Phase | 166.4 | 45.4 | 174.6 | -171.4 | 10.7 | -72.3 |
| 3 | Stress | 2.6 | 2.4 | 0.4 | 32.8 | 1.2 | 1.6 |
|  | Phase | -153.1 | -89.1 | 138.4 | 94.4 | -84.7 | 81.1 |
| 7 | 1 | Stress | 5.2 | 4.0 | 3.6 | 1.2 | 2.8 | 0.3 | 11.6 |
|  | Phase | -5.6 | -13.1 | -20.5 | 170.9 | 171.8 | -23.5 |
| 2 | Stress | 0.4 | 0.1 | 0.1 | 0.1 | 0.1 | 0.0 |
|  | Phase | -9.1 | -5.9 | 7.1 | 164.9 | 164.7 | 13.9 |
| 3 | Stress | 6.0 | 6.4 | 5.0 | 4.3 | 3.1 | 0.3 |
|  | Phase | -66.6 | -82.8 | -82.3 | 94.2 | 94.3 | -74.7 |
| 8 | 1 | Stress | 61.7 | 0.6 | 2.8 | 4.4 | 1.9 | 2.6 | 43.0 |
|  | Phase | -90.4 | 55.6 | -52.9 | -169.0 | -70.5 | -167.8 |
| 2 | Stress | 11.4 | 0.0 | 0.6 | 0.2 | 0.4 | 0.7 |
|  | Phase | -93.9 | 63.2 | -83.3 | -171.1 | -88.1 | -168.6 |
| 3 | Stress | 29.3 | 0.5 | 0.4 | 3.3 | 0.2 | 0.2 |
|  | Phase | 89.1 | -88.4 | 65.3 | 106.1 | 81.9 | -152.0 |
| 9 | 1 | Stress | 209.9 | 4.5 | 1.1 | 1.6 | 0.7 | 6.9 | 259.0 |
|  | Phase | -90.9 | -27.6 | -87.0 | 6.9 | 151.5 | -160.5 |
| 2 | Stress | 24.4 | 0.1 | 0.4 | 0.1 | 0.1 | 0.9 |
|  | Phase | -92.0 | 13.3 | -91.9 | -7.7 | 144.5 | 160.2 |
| 3 | Stress | 27.2 | 0.1 | 0.1 | 8.2 | 0.1 | 1.3 |
|  | Phase | -92.0 | -18.6 | -109.3 | 83.5 | -164.6 | -95.9 |
| 10 | 1 | Stress | 264.2 | 6.7 | 4.5 | 2.5 | 0.8 | 9.9 | 231.5 |
|  | Phase | -85.1 | -111.2 | -90.0 | -13.5 | -120.5 | -33.2 |
| 2 | Stress | 9.1 | 0.3 | 0.2 | 0.5 | 0.0 | 0.4 |
|  | Phase | -94.7 | 121.7 | -100.2 | 43.7 | -168.3 | 63.5 |
| 3 | Stress | 37.5 | 1.3 | 0.2 | 3.1 | 0.3 | 0.6 |
|  | Phase | 91.9 | 91.2 | 97.9 | 78.0 | 97.7 | 82.2 |

# Appendix 4

Table A4.1 Statistic stress components and phase angles under different excitations when *n*=3

|  |  |  | SX | SY | SZ | SXY | SYZ | SXZ | Resultant Von Mises stress |
| --- | --- | --- | --- | --- | --- | --- | --- | --- | --- |
| 70-90 | 80 | Stress /MPa | 81.1 | 21.4 | 2.3 | 24.8 | 2.0 | 2.3 | 85.7 |
| Phase /deg | 177.1 | 179.5 | 178.8 | -1.2 | -176.3 | 1.9 |
| 90-110 | 100 | Stress /MPa | 336.4 | 88.8 | 9.4 | 103.0 | 8.2 | 9.4 | 355.0 |
| Phase /deg | 26.3 | 168.7 | 70.7 | -118.2 | -164.5 | 13.4 |
| 110-130 | 120 | Stress /MPa | 40.1 | 10.6 | 1.1 | 12.3 | 1.0 | 1.1 | 41.1 |
| Phase /deg | 14.8 | 179.5 | 178.9 | -1.1 | -179.5 | 0.3 |
| 230-250 | 240 | Stress /MPa | 6.8 | 2.4 | 0.2 | 2.7 | 0.2 | 0.2 | 7.7 |
| Phase /deg | 170.6 | 176.6 | 176.2 | -5.0 | 178.3 | -2.8 |
| 250-270 | 260 | Stress /MPa | 8.6 | 2.8 | 0.3 | 3.2 | 0.3 | 0.5 | 9.6 |
| Phase /deg | 59.4 | 121.7 | 119.4 | -90.4 | 153.3 | -53.4 |
| 270-290 | 280 | Stress /MPa | 8.1 | 2.9 | 0.3 | 3.3 | 0.2 | 0.3 | 9.2 |
| Phase /deg | 124.5 | 176.2 | 175.5 | -6.8 | 179.6 | -2.1 |
| 390-410 | 400 | Stress /MPa | 40.0 | 16.5 | 1.4 | 18.4 | 0.8 | 1.2 | 47.2 |
| Phase /deg | 156.6 | 160.4 | 159.0 | -21.7 | -26.4 | 150.9 |
| 410-430 | 420 | Stress /MPa | 91.6 | 37.9 | 3.2 | 42.2 | 1.8 | 2.8 | 108.1 |
| Phase /deg | 72.7 | 76.0 | 74.7 | -106.0 | -109.0 | 69.7 |
| 430-450 | 440 | Stress /MPa | 36.4 | 15.0 | 1.3 | 16.7 | 0.7 | 0.7 | 42.9 |
| Phase /deg | 10.9 | 13.6 | 12.5 | -168.1 | -170.0 | 9.3 |

Table A4.2 Statistic stress components and phase angles under different excitations when *n*=5

|  |  |  | SX | SY | SZ | SXY | SYZ | SXZ | Resultant Von Mises stress |
| --- | --- | --- | --- | --- | --- | --- | --- | --- | --- |
| 70-82 | 76 | Stress /MPa | 41.2 | 10.9 | 1.2 | 12.6 | 1.0 | 1.2 | 43.6 |
| Phase /deg | 178.0 | 179.6 | 179.2 | -0.8 | -178.1 | 1.0 |
| 82-94 | 88 | Stress /MPa | 136.1 | 35.9 | 3.8 | 41.6 | 3.3 | 3.8 | 144.0 |
| Phase /deg | 172.9 | 178.7 | 176.6 | -3.6 | -131.8 | 13.2 |
| 94-106 | 100 | Stress /MPa | 328.4 | 86.7 | 9.2 | 100.5 | 8.0 | 9.2 | 347.7 |
| Phase /deg | 26.3 | 168.7 | 70.7 | -118.2 | -164.5 | 13.4 |
| 106-118 | 112 | Stress /MPa | 49.5 | 13.1 | 1.4 | 15.1 | 1.2 | 1.4 | 52.4 |
| Phase /deg | 10.5 | 179.3 | 177.4 | -2.8 | -178.5 | 1.0 |
| 118-130 | 124 | Stress /MPa | 23.7 | 6.3 | 0.7 | 7.3 | 0.6 | 0.7 | 25.1 |
| Phase /deg | 40.8 | 179.6 | 179.1 | -0.8 | -179.8 | 0.1 |
| 230-242 | 236 | Stress /MPa | 5.2 | 1.8 | 0.2 | 2.1 | 0.1 | 0.1 | 5.9 |
| Phase /deg | 172.6 | 177.4 | 177.1 | -3.7 | 178.7 | -2.1 |
| 242-254 | 248 | Stress /MPa | 5.6 | 2.0 | 0.2 | 2.3 | 0.2 | 0.2 | 6.4 |
| Phase /deg | 161.0 | 171.8 | 171.3 | -11.6 | 175.5 | -7.2 |
| 254-266 | 260 | Stress /MPa | 6.7 | 2.1 | 0.2 | 2.4 | 0.3 | 0.4 | 7.4 |
| Phase /deg | 59.4 | 121.7 | 119.4 | -90.4 | 153.3 | -53.4 |
| 266-278 | 272 | Stress /MPa | 6.6 | 2.3 | 0.2 | 2.6 | 0.2 | 0.3 | 7.4 |
| Phase /deg | 43.1 | 173.1 | 172.2 | -15.1 | 177.8 | -5.3 |
| 278-290 | 284 | Stress /MPa | 6.1 | 2.2 | 0.2 | 2.5 | 0.1 | 0.2 | 6.9 |
| Phase /deg | 151.9 | 176.8 | 176.0 | -5.5 | -179.9 | -1.4 |
| 390-402 | 396 | Stress /MPa | 27.4 | 11.3 | 1.0 | 12.6 | 0.5 | 0.8 | 32.4 |
| Phase /deg | 159.8 | 163.7 | 162.2 | -18.4 | -23.6 | 153.1 |
| 402-414 | 408 | Stress /MPa | 60.8 | 25.1 | 2.1 | 28.0 | 1.2 | 1.9 | 71.8 |
| Phase /deg | 144.6 | 148.2 | 146.8 | -33.9 | -37.8 | 140.2 |
| 414-426 | 420 | Stress /MPa | 87.4 | 36.1 | 3.1 | 40.2 | 1.7 | 2.7 | 103.1 |
| Phase /deg | 72.7 | 76.0 | 74.7 | -106.0 | -109.0 | 69.7 |
| 426-438 | 432 | Stress /MPa | 44.5 | 18.4 | 1.6 | 20.5 | 0.9 | 1.4 | 52.5 |
| Phase /deg | 19.9 | 22.8 | 21.7 | -159.0 | -161.3 | 17.8 |
| 438-450 | 444 | Stress /MPa | 25.0 | 10.3 | 0.9 | 11.5 | 0.5 | 0.8 | 29.5 |
| Phase /deg | 8.3 | 10.8 | 9.9 | -170.8 | -172.5 | 6.9 |
